# Supplementary material for: Identification of Distinct Tumor Subpopulations in Lung Adenocarcinoma via Single-Cell RNA-seq
Source: PubMed Central journal article supplement (PMC4549254; doi:10.1371/journal.pone.0135817), 2015-08-25

**A**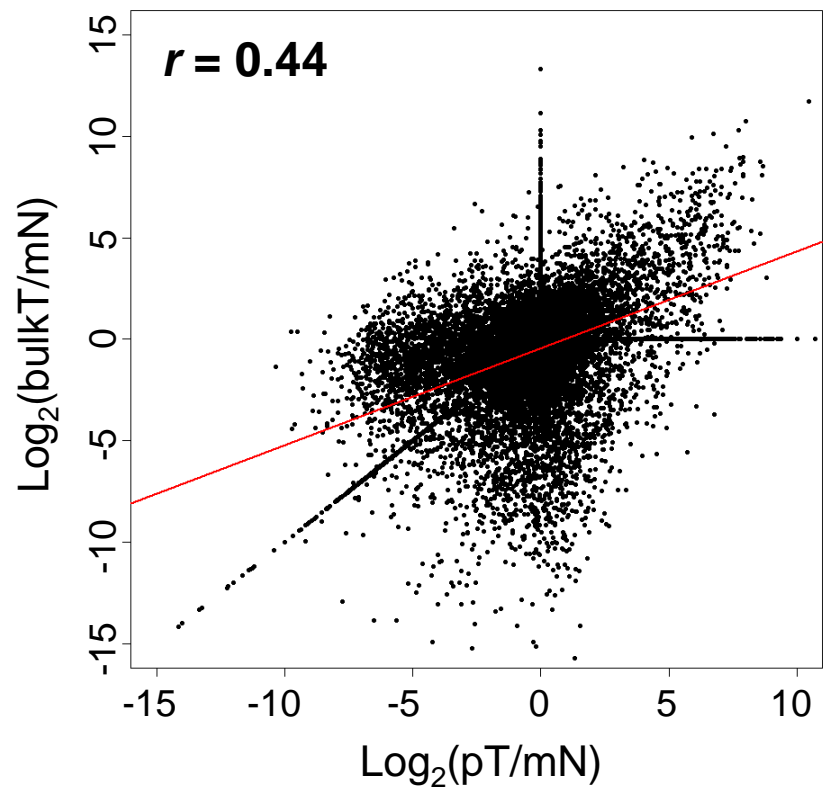**B**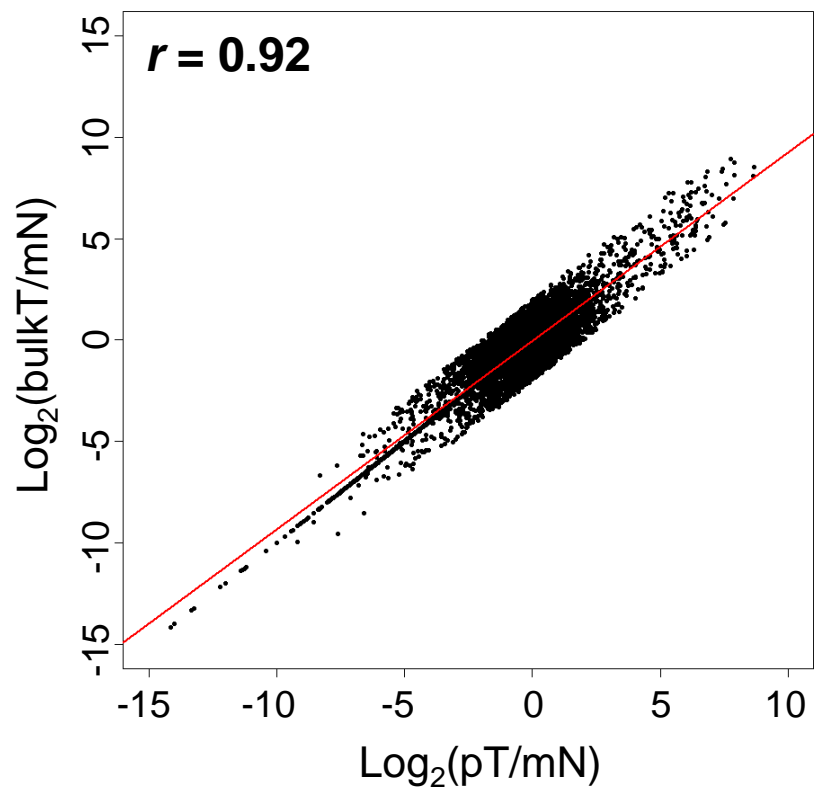

Supplement: pone.0135817.s004.pdf [file pone.0135817.s004.pdf]
