# Supplementary material for: Identification of Distinct Tumor Subpopulations in Lung Adenocarcinoma via Single-Cell RNA-seq
Source: PubMed Central journal article supplement (PMC4549254; doi:10.1371/journal.pone.0135817), 2015-08-25
Supplement: pone.0135817.s006.pdf [file pone.0135817.s006.pdf]

Foldchange(Log<sub>2</sub>)

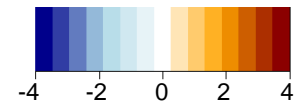

**G64**

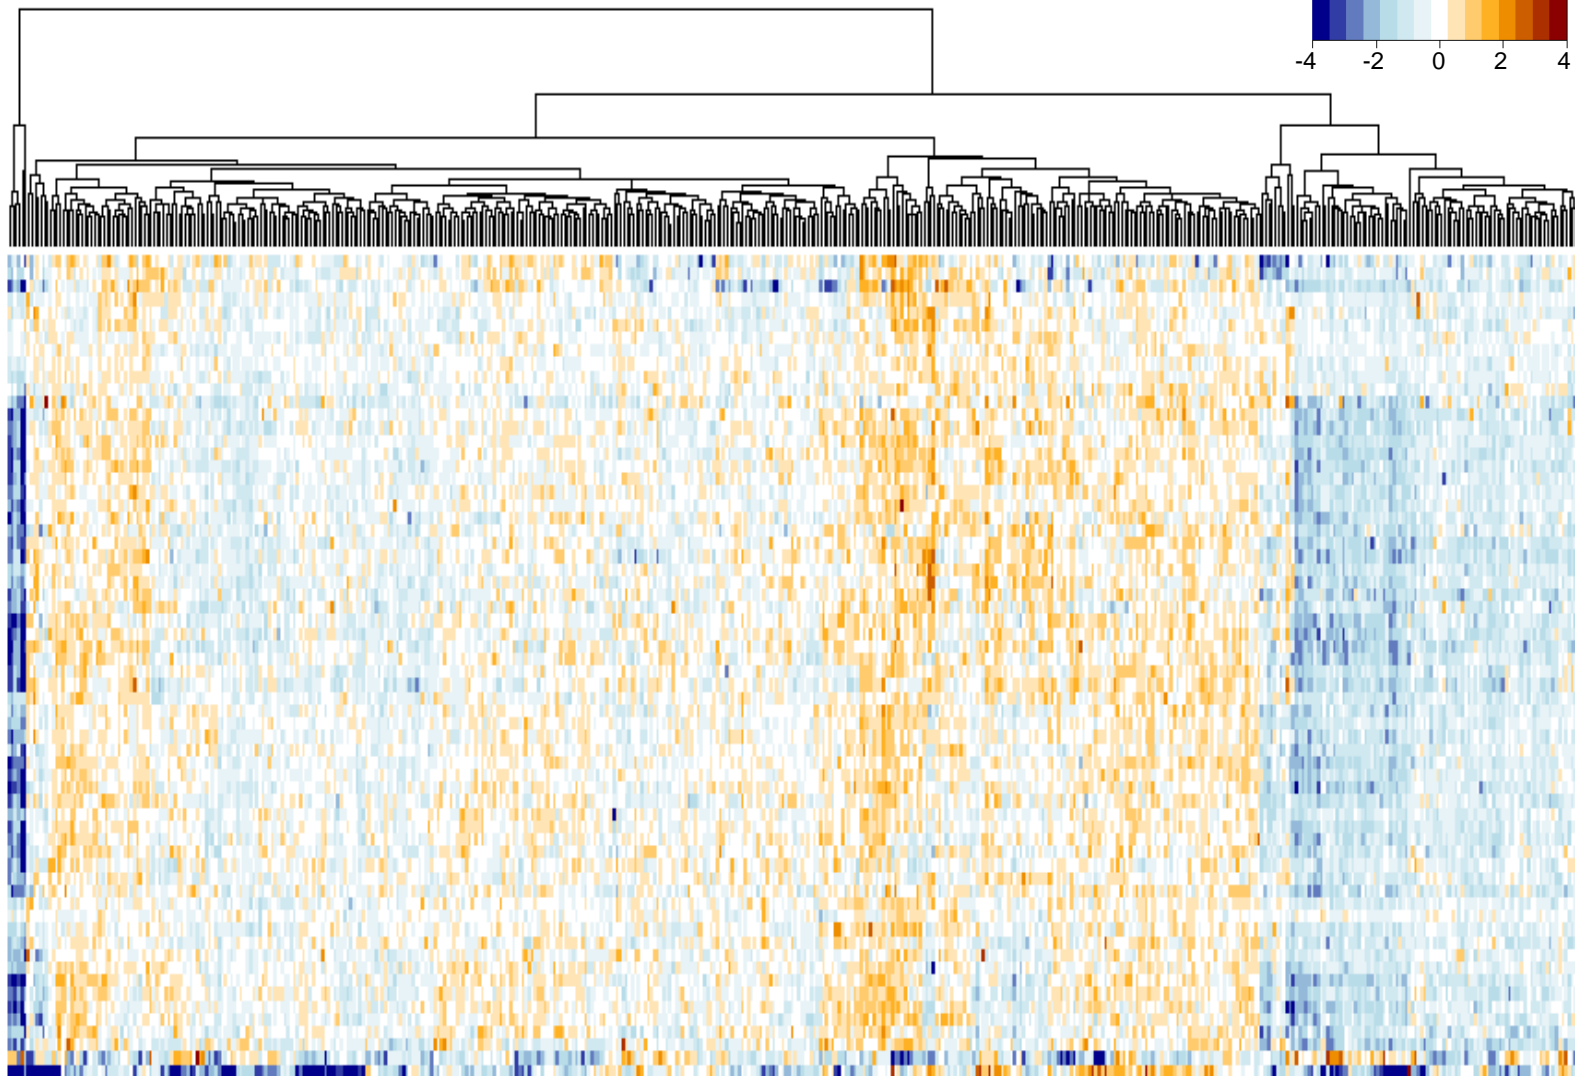

**TCGA LUSC samples (n = 501)**
